# Supplementary material
Source: publisher figshare collection journal article supplement (https://frontiersin.figshare.com/ndownloader/files/26344372)
Supplement: Supplementary file [file 26344372]

**Supplementary Table S1-S4** Primers used in this study.

**Table S1** Primers used for identification of *ats40.4* mutants. LP, forward primer; RP, reverse primer.

| Primer             | Sequence                       | Mutant           |
|--------------------|--------------------------------|------------------|
| <i>ats40.4-1LP</i> | 5'-TAAAACTCGGAAAGGATGCG C-3'   | GABI_561G08      |
| <i>ats40.4-1RP</i> | 5'-AAACGAAATTCAAGTTTTGAGC-3'   |                  |
| <i>ats40.4-2LP</i> | 5'-CGTCAACTTCTTCCTCATTGCG-3'   | GABI_863C05      |
| <i>ats40.4-2RP</i> | 5'-CATTCGTCTAGCTCGAAATCG -3'   |                  |
| LBGABI             | 5'- ATATTGACCATCATACTCATTGC-3' | For GABI mutants |

**Table S2** Lists of primers used for vector construction and identification of transgenic lines. F, forward primer; R, reverse primer.

| Primer                           | Sequence                                | Amplicon Size and Construct                                                                                      |
|----------------------------------|-----------------------------------------|------------------------------------------------------------------------------------------------------------------|
| <i>AtS40.4F_</i><br><i>Xba I</i> | 5'-TCTAGATTCTTCTTCTGAAATGCGC-3'         | 506 bp including the <i>AtS40.4</i> CDS<br>(489 bp) and 17 bp UTR;                                               |
| <i>AtS40.4R_</i><br><i>Kpn I</i> | 5'-GGTACCTAAATTAATCTTCGATCCCTC-3'       | 35S:: <i>AtS40.4</i>                                                                                             |
| <i>AtS40.4PF</i>                 | 5'-GTTCAACCAAACTCTTACCTTCA-3'           | 1403 bp promoter, 489 bp CDS, and 3                                                                              |
| <i>AtS40.4R</i>                  | 5'-TAAATAATCTTCGATCCCTC-3'              | bp 3' UTR of <i>AtS40.4</i> ;<br><i>proAtS40.4::S40.4-GFP</i>                                                    |
| <i>AtS40.4PF</i>                 | 5'-GTTCAACCAAACTCTTACCTTCA-3'           | 1403 bp promoter of <i>AtS40.4</i> ;                                                                             |
| <i>AtS40.4PR</i>                 | 5'-GGCGGTGACGTGTTGGT-3'                 | <i>proS40.4::GUS</i>                                                                                             |
| 35SF                             | 5'-GAAGGTGGCTCCTACAAATGCCA -3'          | Together with <i>AtS40.4R_KpnI</i> for<br>identification of 35S:: <i>AtS40.4</i><br>transgenic lines             |
| GUSR                             | 5'-CACAGTTCATAGAGATAACCTTCACCCG -<br>3' | Together with <i>AtS40.4PF</i> for<br>identification of <i>proS40.4::GUS</i><br>transgenic plants                |
| GFPR                             | 5'-CACCTTCACCCTCTCCACTG -3'             | Together with <i>AtS40.4PF</i> for<br>identification of <i>proAtS40.4::S40.4-</i><br><i>GFP</i> transgenic lines |

The boxes in the primer sequences indicate the star and terminal codons of *AtS40.4* CDS. The underlines denote the nucleotide sequence for exonucleases *Xba I* and *Kpn I*. The underline and box indicate the mutated terminal codons of *AtS40.4* CDS.

**Table S3** Primers used for RT-PCR analysis for *AtS40.4* expression level. F, forward primer; R, reverse primer.

| Primer            | Sequence                            | Gene                  |
|-------------------|-------------------------------------|-----------------------|
| <i>AtS40.4RTF</i> | 5'- <u>ATG</u> GCGACGAGCAAGTGCTA-3' | <i>AtS40.4</i>        |
| <i>AtS40.4RTR</i> | 5'-ATCTTCGATCCCTCTAATTTTAAAA-3'     | (486bp)               |
| <i>TUBULIN2F</i>  | 5'-GGTATCCAGGTCGAAATGC-3'           | Internal control gene |
| <i>TUBULIN2R</i>  | 5'-TCCCGTAGTCAACAGAAAGT-3'          | <i>TUBULIN2</i>       |

The boxes in the primer sequences indicate the star codons of *AtS40.4* CDS. The PT-PCR product includes the sequences of *AtS40.4* CDS from star codons to the nucleotide sequence before terminal codons TAA of *AtS40.4* CDS.

**Table S4** Primers used for qRT-PCR analysis. F, forward primer; R, reverse primer.

| Primer             | Sequence                        | Gene           |
|--------------------|---------------------------------|----------------|
| <i>AtS40.4qRTF</i> | 5'-GCCACCGTTTCTTACCAC-3'        | <i>AtS40.4</i> |
| <i>AtS40.4qRTR</i> | 5'-CGGATGTGATTGTAAGGTCATAAAG-3' | (132 bp)       |
| <i>ABI1F</i>       | 5'-CCATGTCGAGATCCATTGGC-3'      | <i>ABI1</i>    |
| <i>ABI1R</i>       | 5'-CAGTTCAAGGGTTTGCTCTTGAG-3'   |                |
| <i>ABI2F</i>       | 5'-ATGGCGGTTCTCAGGTAGCGA-3'     | <i>ABI2</i>    |
| <i>ABI2R</i>       | 5'-AACCACCGAGGTAGACCCAACAG-3'   |                |
| <i>ABI3F</i>       | 5'-ACGTGAGCAGGTGGTACCAG-3'      | <i>ABI3</i>    |
| <i>ABI3R</i>       | 5'-GGCAAGTGTGTCTCAGCTTC-3'      |                |
| <i>ABI4F</i>       | 5'-ATGGACCCCTTAGCTTCCCAAC-3'    | <i>ABI4</i>    |
| <i>ABI4R</i>       | 5'-CTTTGCGTTTGCGTTGAGCG-3'      |                |
| <i>ABI5F</i>       | 5'-TCGACAAGGCTCTTGACAC-3'       | <i>ABI5</i>    |
| <i>ABI5R</i>       | 5'-ATTACCGCTACCACCACCTC-3'      |                |
| <i>RD29AF</i>      | 5'-GCCGACGGGATTTGACG-3'         | <i>RD29A</i>   |
| <i>RD29AR</i>      | 5'-GCCGGAAATTTATCCTCTTCTGA-3'   |                |
| <i>SnRK2.6F</i>    | 5'-TCCGGTAATTTGGAGTTGC-3'       |                |

*SnRK2.6R*

5'-CCACCATTAATACCACGTTCC-3'

*SnRK2.6R*

*GAPDHF*

5'-TGGTTGATCTCGTTGTGCAGGTCTC-3'

*GAPDHR*

*GAPDHR*

5'-GTCAGCCAAGTCAACAACCTCTCTG-3'

---
